# Supplementary material for: Ligand-Receptor Interactions and Machine Learning in GCGR and GLP-1R Drug Discovery
Source: PubMed Central journal article supplement (PMC8071054; doi:10.3390/ijms22084060), 2021-04-14
Supplement: ijms-22-04060-s001.pdf [file ijms-22-04060-s001.pdf]

## Supplemental data

### Ligand-receptor interactions in machine learning-assisted GCGR and GLP-1R drug discovery

Mikołaj Mizera, Dorota Latek  
Faculty of Chemistry, University of Warsaw  
Pasteura 1, 02-093 Warsaw, Poland

This file includes Table S1 and Figures S1-S7 and that corresponds to the main manuscript text.

#### Tables

**Table S1.** Flexible residues (grey) selected in binding sites 1-4 of GLP-1R and in the binding site 4 of GCGR with PDB ligands (yellow).

| Receptor | Binding site | PDB id | Residues kept as flexible during molecular docking                                   |
|----------|--------------|--------|--------------------------------------------------------------------------------------|
| GLP-1R   | 1            | 6ORV   | 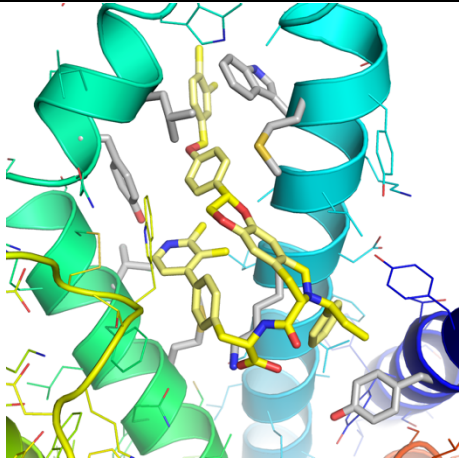  |
|          | 2            | 7C2E   |  |

---

3                    6VCB

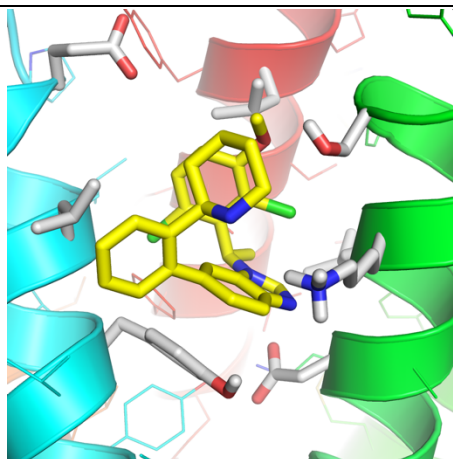

---

4 (I)                6LN2

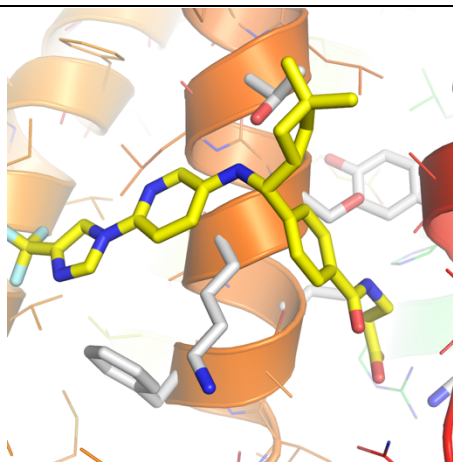

---

4 (II)              5VEW

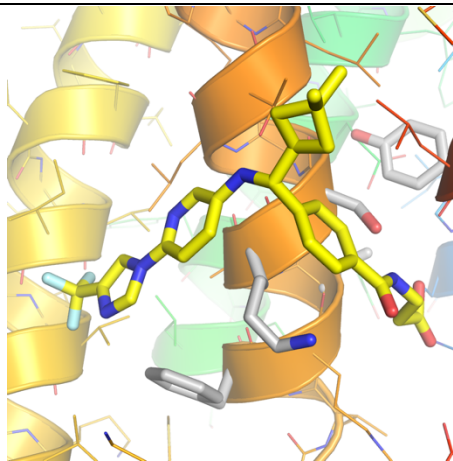

---

GCGR

4

5XEZ

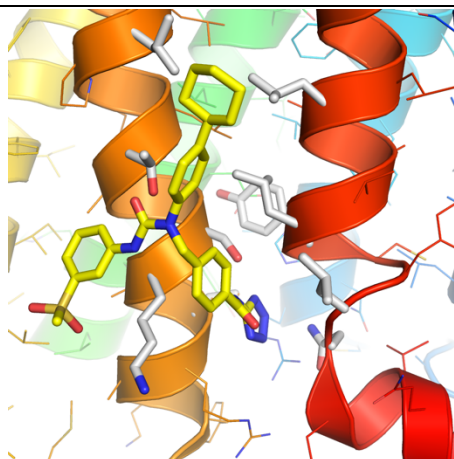

## Figures

**Figure S1.** Distribution of ChEMBL datasets – Daylight/Tanimoto coefficients vs. pEC50 (GLP-1R – left) and pIC50 (GCGR - right). GLP-1R dataset splits into two groups – one dissimilar to the site 1 ligands and another – similar to the site 1 ligands. The latter group demonstrates high pEC50. In the case of GCGR, ligands formed four clusters with decreasing number of members. Ligands similar to the binding site 4 ligand demonstrated rather high pIC50, though not the best possible.

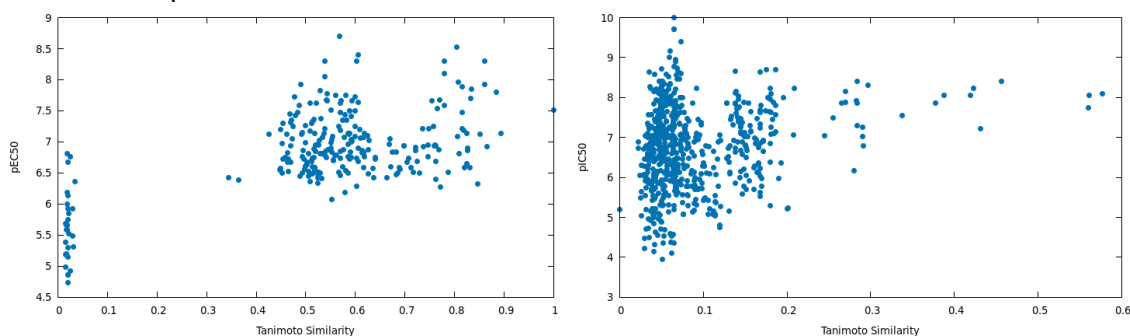

**Figure S2.** AlogP of the GLP-1R ligand set vs. Autodock VINA binding energy. Here, the binding site 1 from 6ORV was used in molecular docking. Autodock VINA scores (ligand binding energies) reflected the compound lipophilicity. Site 1 of GLP-1R demonstrated high affinity for lipophilic ligands.

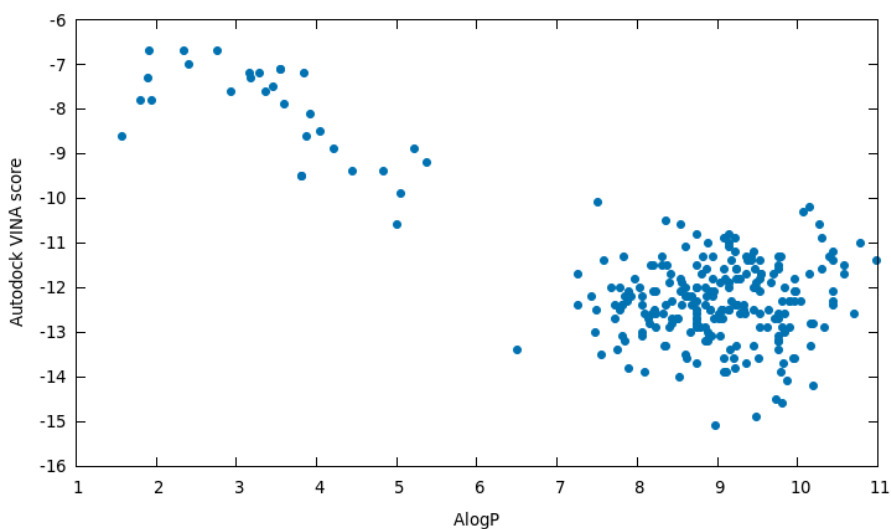

**Figure S3.** Results of docking of GLP-1R actives to all possible binding sites. Compounds similar to the binding site 1 ligand were scored better by Autodock VINA than the 'other' compounds in all cases. Results for docking to the binding site 1 are presented in the main manuscript. Inverse correlation coefficients were in the range of 0.4-0.6.

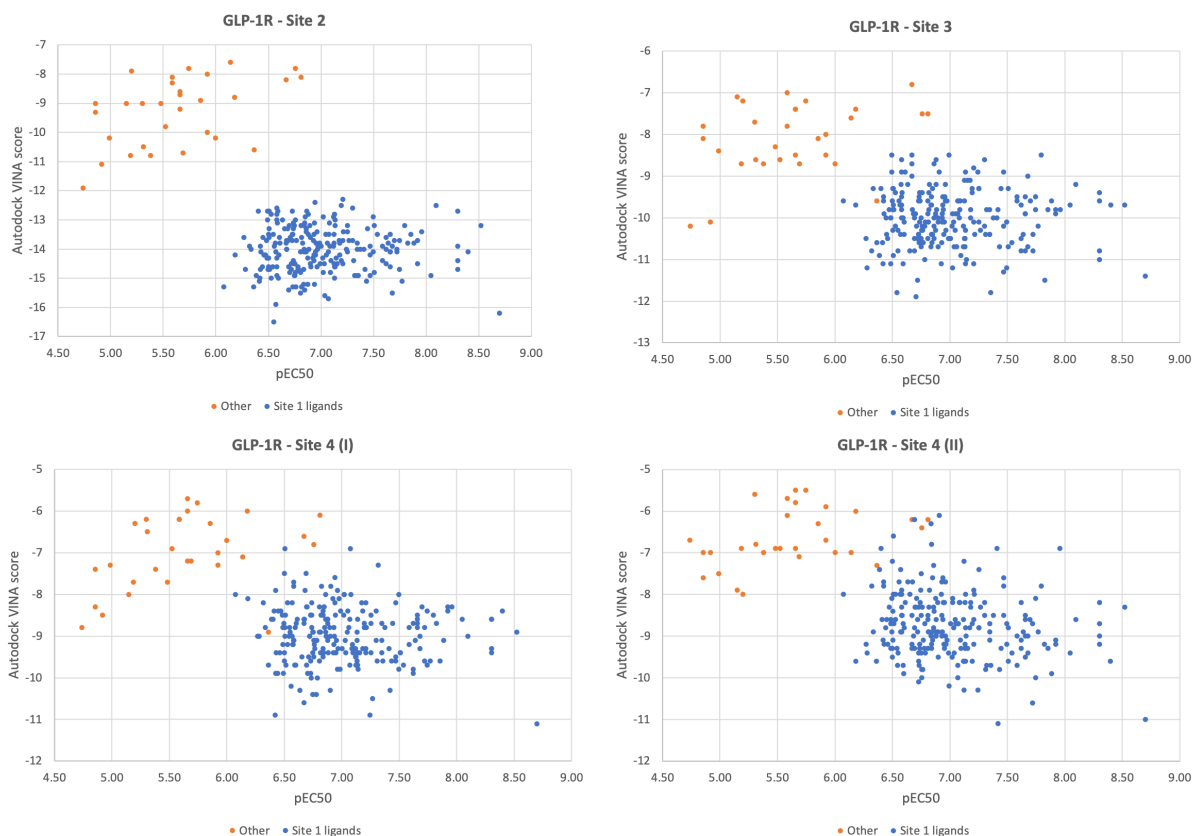

**Figure S4.** Autocorrelation plots of true vs. predicted values of EC50 (GLP1R) and true vs. predicted values of IC50 (GCGR).

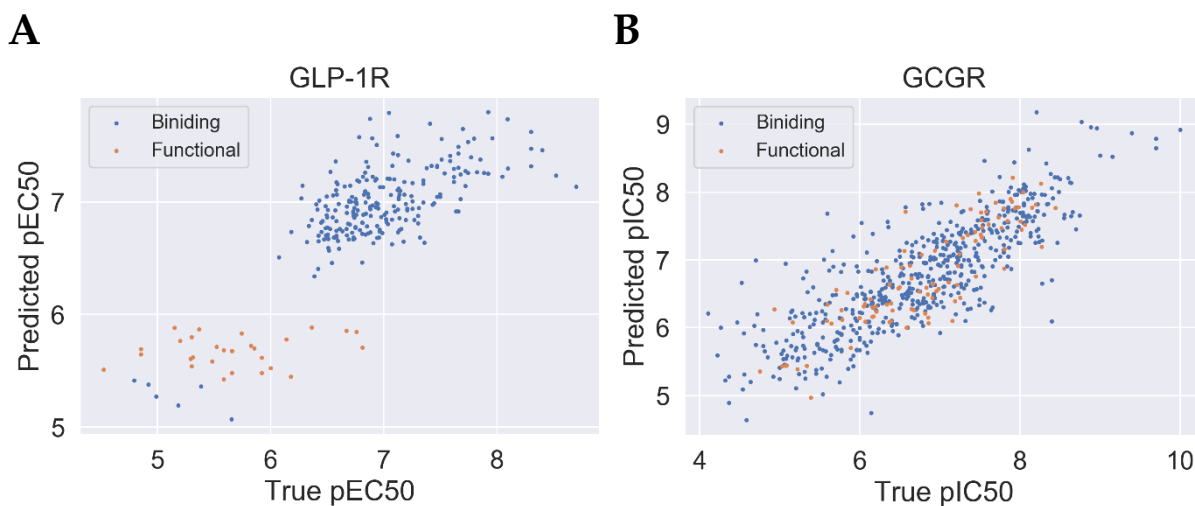

**Figure S5.** Multidimensional scaling embedding (MDS) for the relative similarity of ligand structures in GLP-1R dataset (A) and GCGR dataset (B). 'True pEC50/IC50' means in this case 'Experimental pEC50/pIC50'.

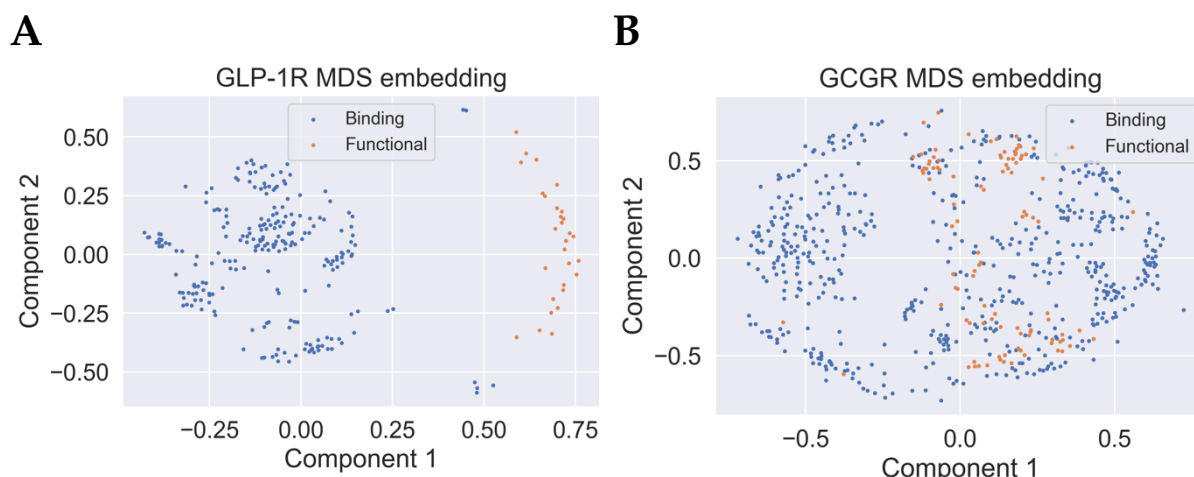

**Figure S6.** Compounds derived from the CMAUP database with confirmed activity for GCGR. Although both compounds are dissimilar to any of PDB ligands, compound NPC471603 (left) from *Mammea siamensis* could be modified to fit the V-shape of known NAMs. Molecular weight and shape of compound NPC62792 (right) from *Trigonostemon reidioides* - suggest that it would rather bind to the orthosteric site, if to any.

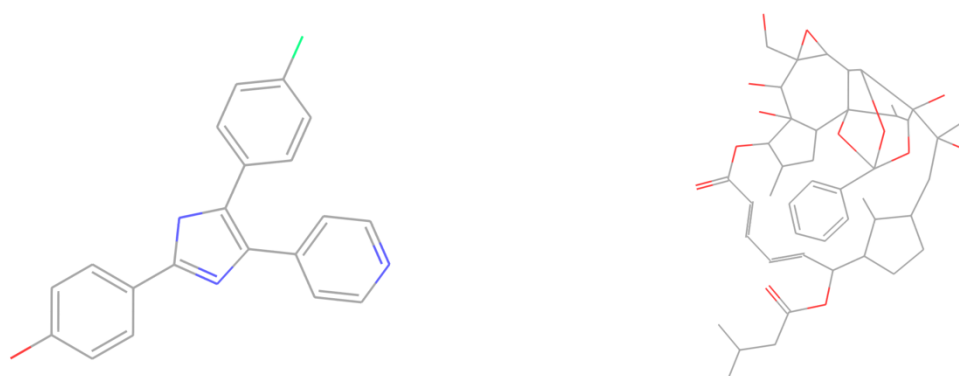

**Figure S7.** A distinct compound found with our model in *Mammea siamensis* extract for GLP-1R. This compound is not similar to any of GLP-1R actives that bind to sites 1-4.

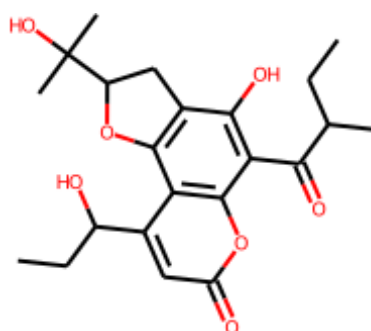

NPC470908
